# Supplementary material for: ATP increases the migration of microglia across the brain endothelial cell monolayer
Source: Oxford University Press journal article supplement (doi:10.1042/bsr20160054), 2016-03-03
Supplement: bsr20160054_supp.pdf [file bsr20160054_supp.pdf]

## **Supplemental Information**

### **ATP increases the migration of microglia across the brain endothelial cell monolayer**

Tomoji Maeda \* , Manato Inagaki, Yu Fujita, Takehiro Kimoto, Chiaki Tanabe-Fujimura, Kun Zou, Junjun Liu, Shuyu Liu, and Hiroto Komano \*

*Department of Neuroscience, School of Pharmacy, Iwate Medical University,*

## Suppl Table 1

**Supplemental Table 1: Gene expression of MMPs in Ra2 microglia and MBECs**  
Data were globally normalized per array to obtain the median signal intensity.

| <b>Gene Symbol</b> | <b>Raw data (normalized)</b> |             |
|--------------------|------------------------------|-------------|
|                    | <b>Ra2</b>                   | <b>MBEC</b> |
| <b>MMP1a</b>       | -                            | <b>5.7</b>  |
| <b>MMP1b</b>       | -                            | -           |
| <b>MMP2</b>        | <b>714</b>                   | <b>46.7</b> |
| <b>MMP3</b>        | <b>7.2</b>                   | <b>35.2</b> |
| <b>MMP8</b>        | -                            | -           |
| <b>MMP9</b>        | <b>5.0</b>                   | <b>5.9</b>  |

Suppl Figure 1

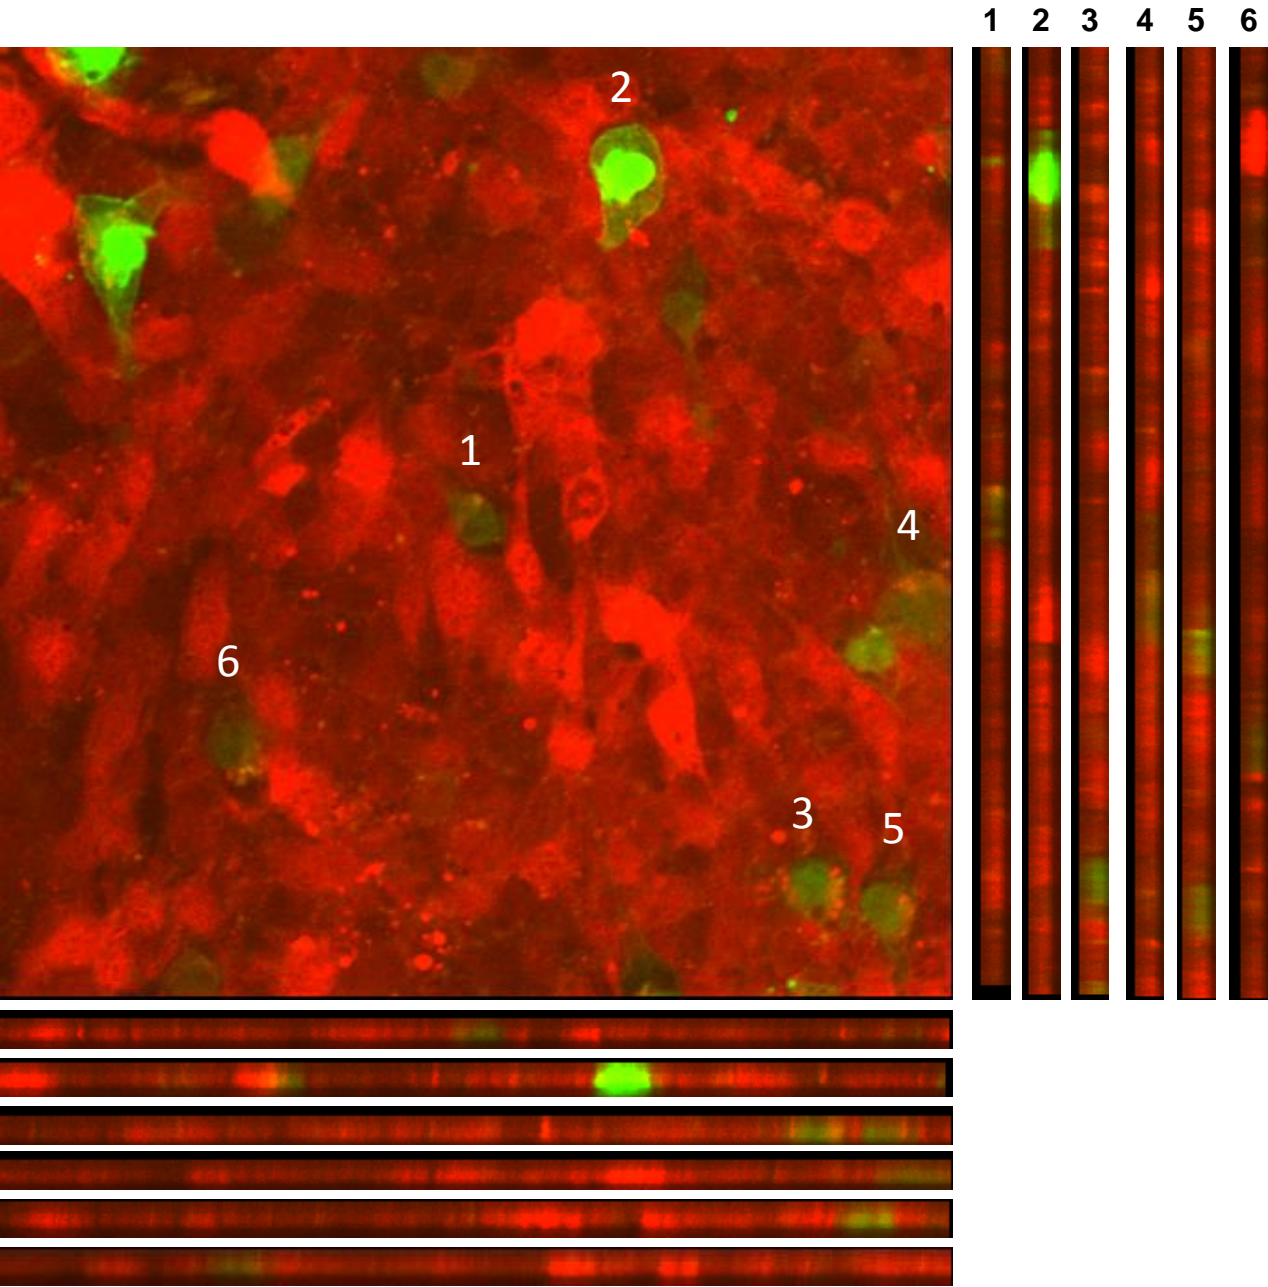

**Supplemental Figure 1: Confocal laser scanning microscopy analysis of Ra2 cells in the mouse brain endothelial cell (MBEC) monolayer.**

Detailed analysis of a vertically and horizontally cross-sectioned sample.

The main, lower, and right panels of each image represent the view of the xy-, xz-, and yz-planes respectively. Numbers (1-6) indicate the focused Ra2 cells.
